# Supplementary material for: A 1D conical nanotubular TiO2/CdS heterostructure with superior photon-to-electron conversion
Source: Royal Society of Chemistry journal article supplement (doi:10.1039/c8nr02418a), 2018-01-01
Supplement: c8nr02418a1.pdf [file c8nr02418a1.pdf]

Electronic Supplementary Information

**1D conical nanotubular TiO<sub>2</sub> / CdS heterostructure for superior photon-to-electron conversion**

R. Zazpe<sup>a,b</sup>, H. Sopha<sup>a,b</sup>, J. Prikryl<sup>a</sup>, M. Krbal<sup>a</sup>, J. Mistrik<sup>a</sup>, F. Dvorak<sup>a</sup>, L. Hromadko<sup>a</sup>, J.M. Macak<sup>a,b</sup> \*

<sup>a</sup> Center of Materials and Nanotechnologies, Faculty of Chemical Technology, University of Pardubice, Nam. Cs. Legii 565, 530 02 Pardubice, Czech Republic.

<sup>b</sup> Central European Institute of Technology, Brno University of Technology, Purkynova 123, Brno, Czech Republic

\*Corresponding Author: e-mail: [jan.macak@upce.cz](mailto:jan.macak@upce.cz)

Phone: +420-466 037 401

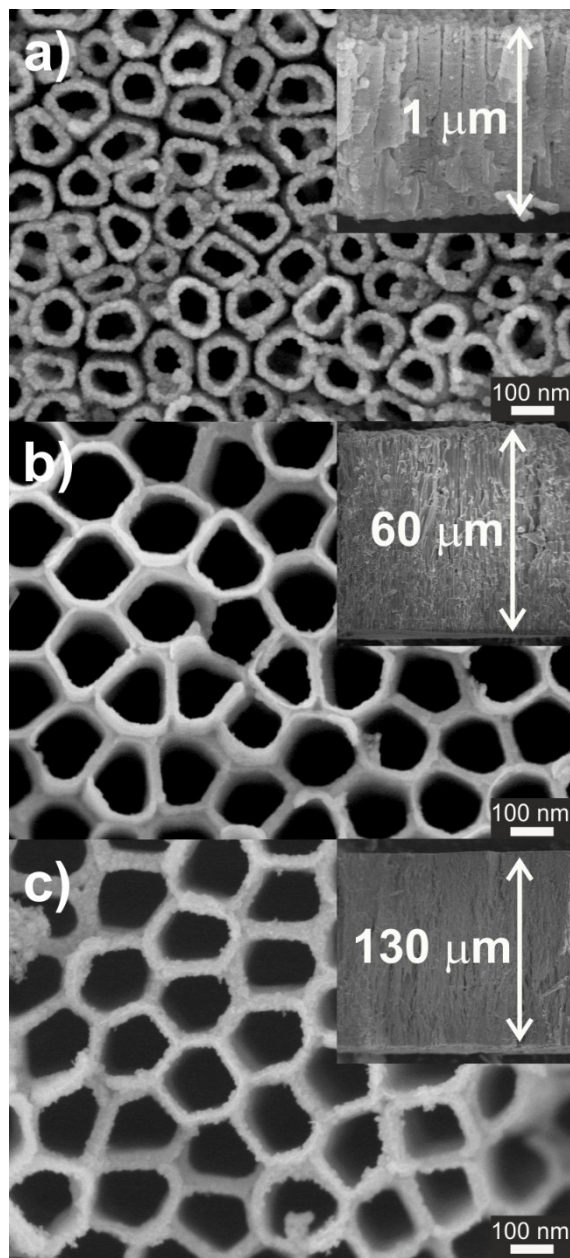

**Fig. S1.** SEM top view images of the CdS coated (5 nm) TiO<sub>2</sub> nanotube layers of different thickness: 1 μm (a, b) 60 μm (c, d) and 130 μm (e, f). Insets: cross-sectional SEM images of the corresponding TiO<sub>2</sub> nanotube layers.

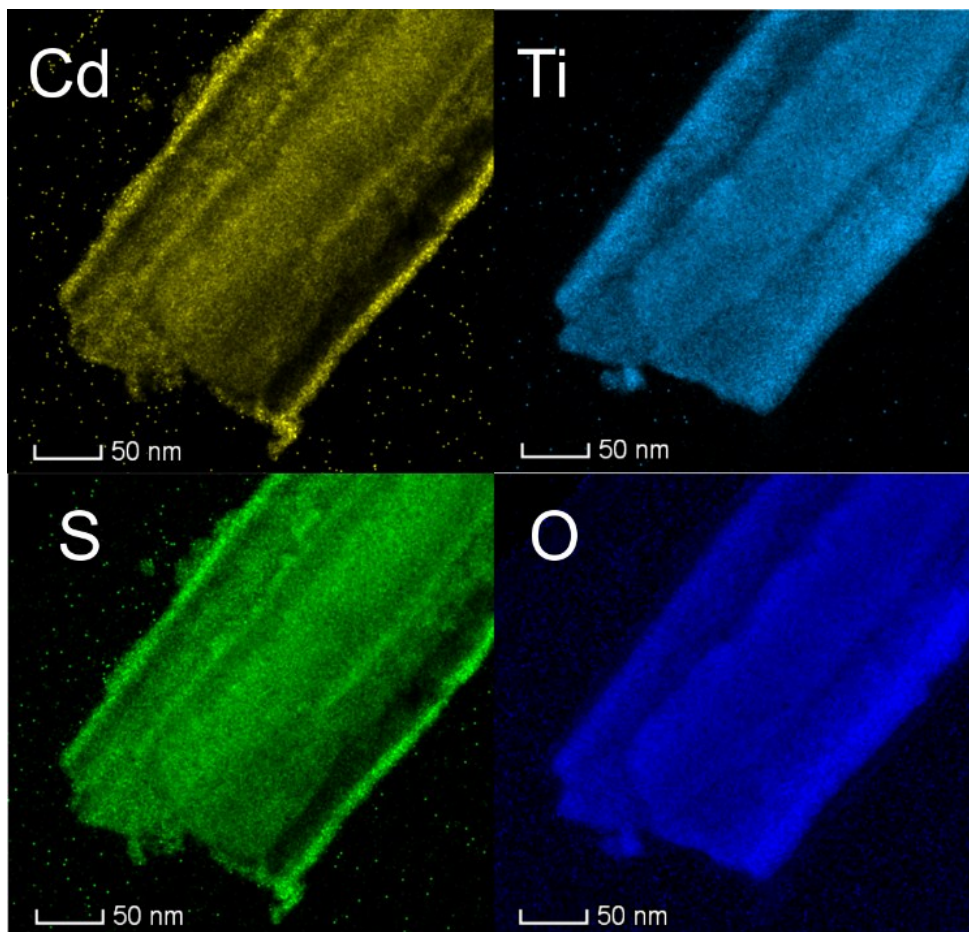

**Fig. S2.** Elemental STEM/EDX maps of a fragment of a single 130  $\mu\text{m}$   $\text{TiO}_2$  nanotube coated with 5 nm of CdS.

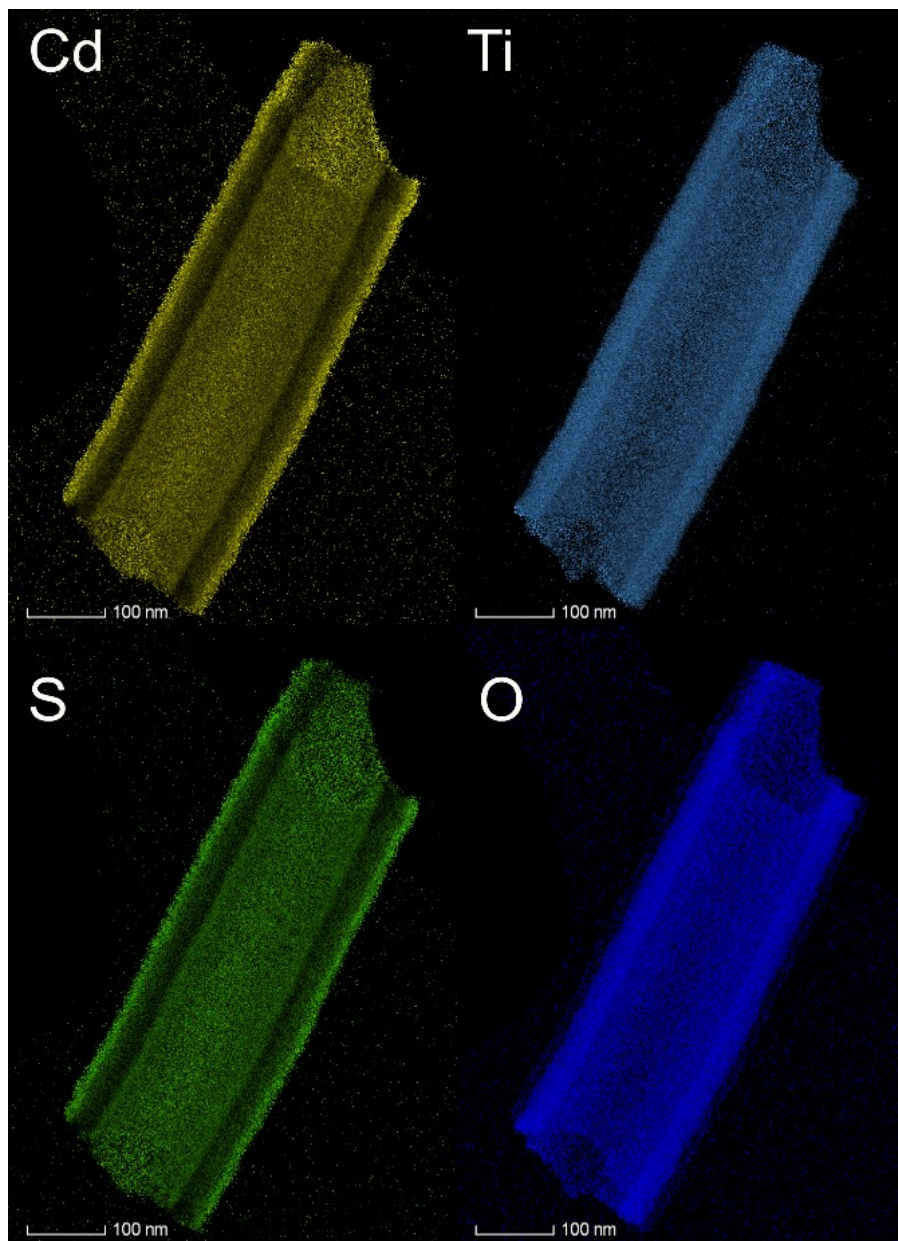

**Fig. S3.** Elemental STEM/EDX maps of a fragment of a single 20 μm TiO<sub>2</sub> nanotube coated with 10 nm of CdS.

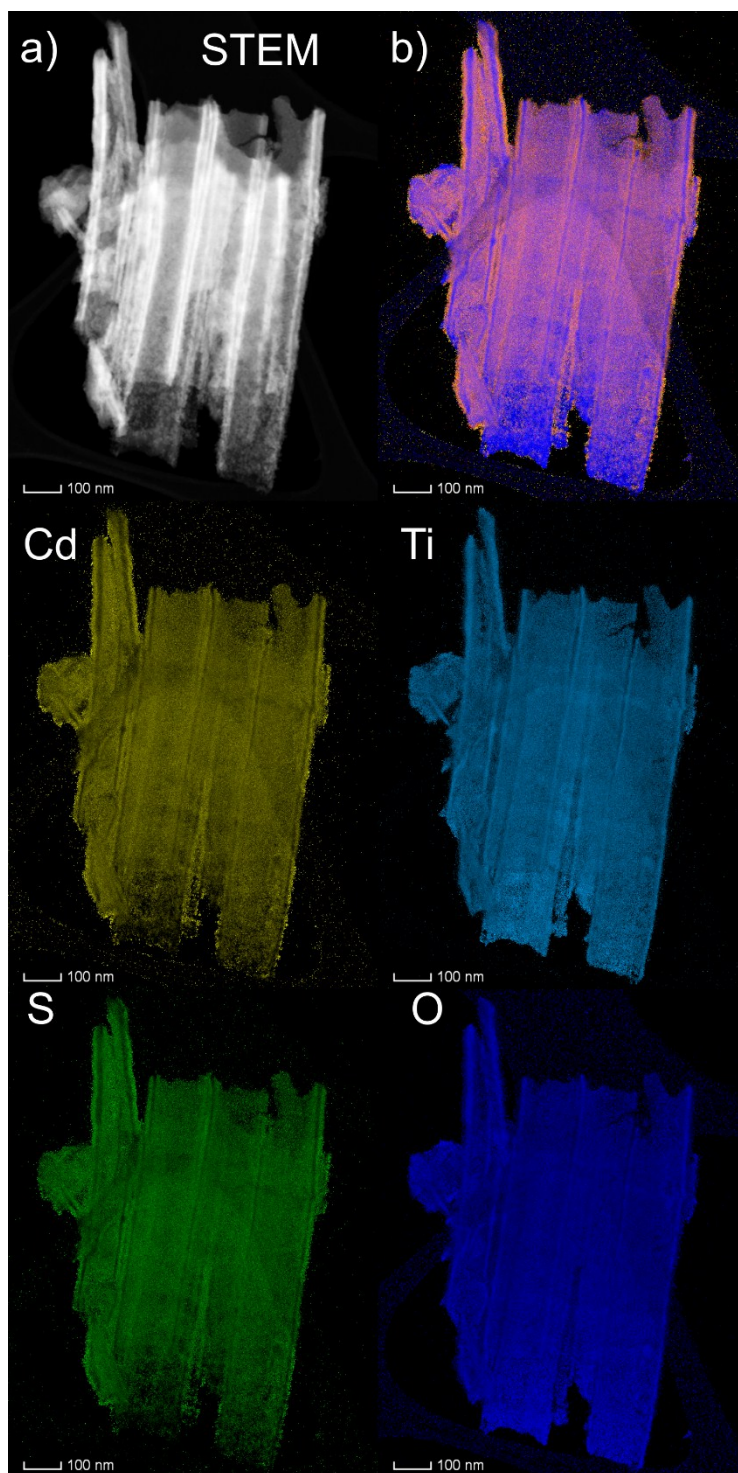

**Fig. S4.** A HAADF-STEM image of (a) a bundle of 130  $\mu\text{m}$  thick  $\text{TiO}_2$  nanotube layer coated with 5 nm of CdS, and (b) corresponding overall STEM/EDX elemental map. Other images show STEM/EDX maps for individual elements.

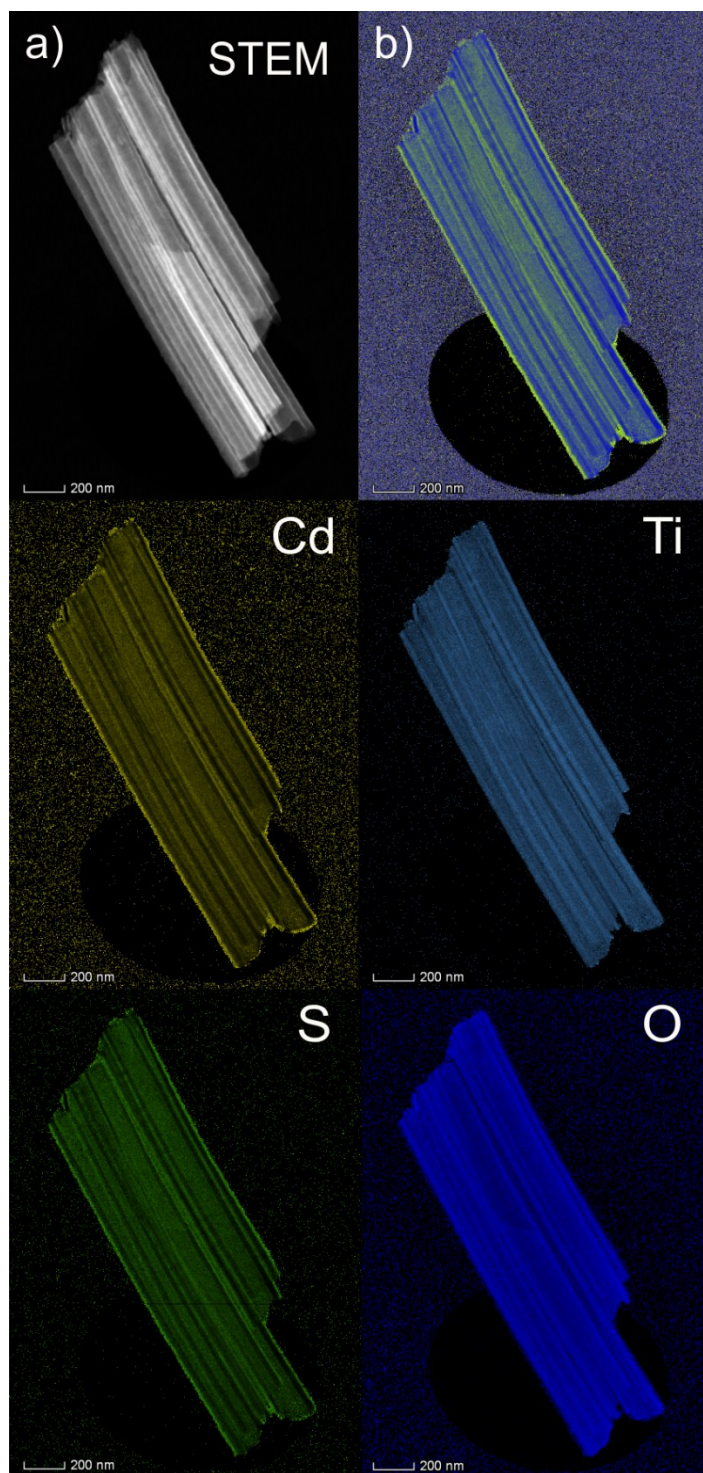

**Fig. S5.** A HAADF-STEM image of (a) a bundle of 20  $\mu\text{m}$  thick  $\text{TiO}_2$  nanotube layer coated with 10 nm of CdS, and (b) corresponding overall STEM/EDX elemental map. Other images show STEM/EDX maps for individual elements.

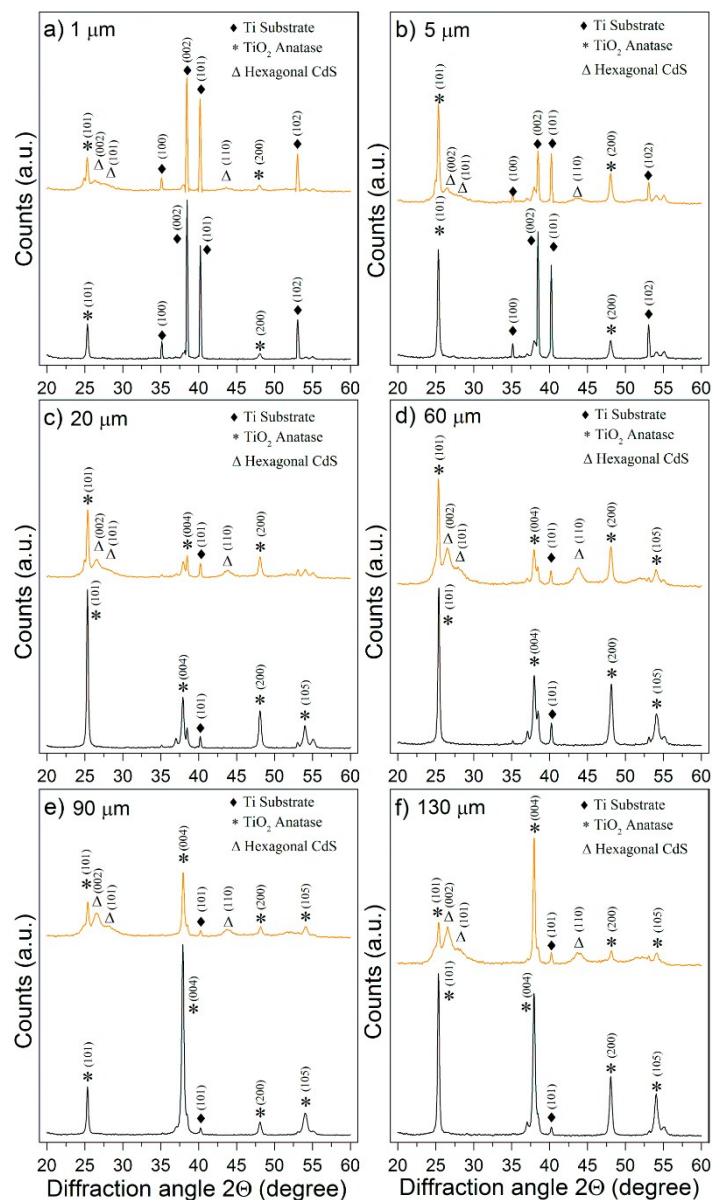

**Fig. S6.** XRD patterns of blank (lower black lines) and CdS coated (upper orange lines) TiO<sub>2</sub> nanotube layers (a) 1 μm, (b) 5 μm, (c) 20 μm, (d) 60 μm, (e) 90 μm, and (f) 130 μm thick.

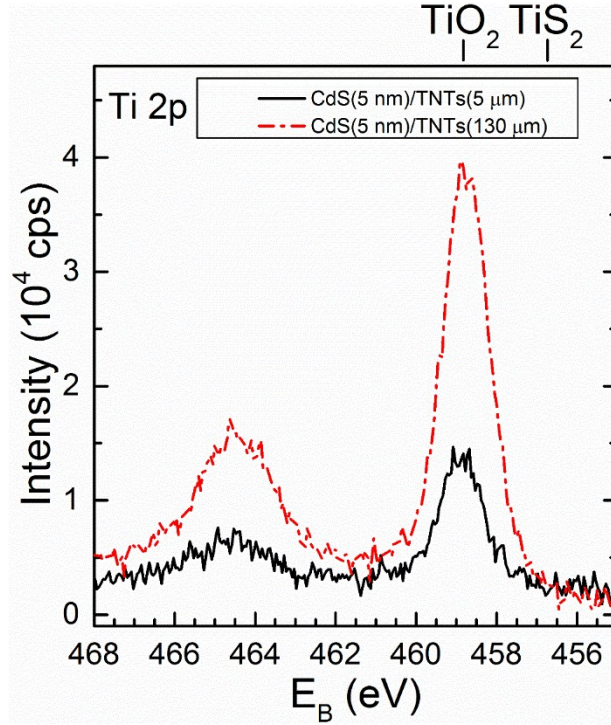

**Fig. S7.** XPS Ti 2p spectra of CdS coated TiO<sub>2</sub> nanotube layers 1 μm (black solid line) and 130 μm thick (red dashed line). The binding energy of Ti-O and Ti-S bonds are indicated at the top axis. The spectra show the absence of Ti-S bond.

#### CdS/TNT band alignment determined by XPS

The band offsets at the CdS/TiO<sub>2</sub> interface were determined by XPS following the concept introduced by Kraut et al. [1]. The valence band offset (VBO) at CdS/TiO<sub>2</sub> interface was determined according to following relation:

$$VBO = - (EB_{Ti2p} - VBM_{TiO_2})^{(i)} + (EB_{Cd3d} - VBM_{CdS})^{(ii)} + (EB_{Ti2p} - EB_{Cd3d})^{(iii)} \quad (1)$$

where  $EB_{Ti2p}$  and  $EB_{Cd3d}$  are binding energies of Ti 2p<sub>3/2</sub> and Cd 3d<sub>5/2</sub> core level lines, respectively, and  $VBM_{TiO_2}$  and  $VBM_{CdS}$  are valence band maxima of TiO<sub>2</sub> and CdS, respectively, collected from TiO<sub>2</sub> reference, CdS reference, and CdS/TiO<sub>2</sub> interface as illustrated



in Fig. S8. Blank, 2.5 nm CdS coated, and 10 nm CdS coated TNT layers were used as TiO<sub>2</sub> reference, interface, and CdS reference, respectively. Based on obtained values listed in Table S1 the valence band of TiO<sub>2</sub> is found to lie (1.2 ± 0.2) eV below valence band of CdS at CdS/TiO<sub>2</sub> interface. The conduction band offset (CBO) was calculated using the conventional bulk band gap values of anatase TiO<sub>2</sub> (3.2 eV) and CdS (2.4 eV) to be (0.4 ± 0.2) eV.

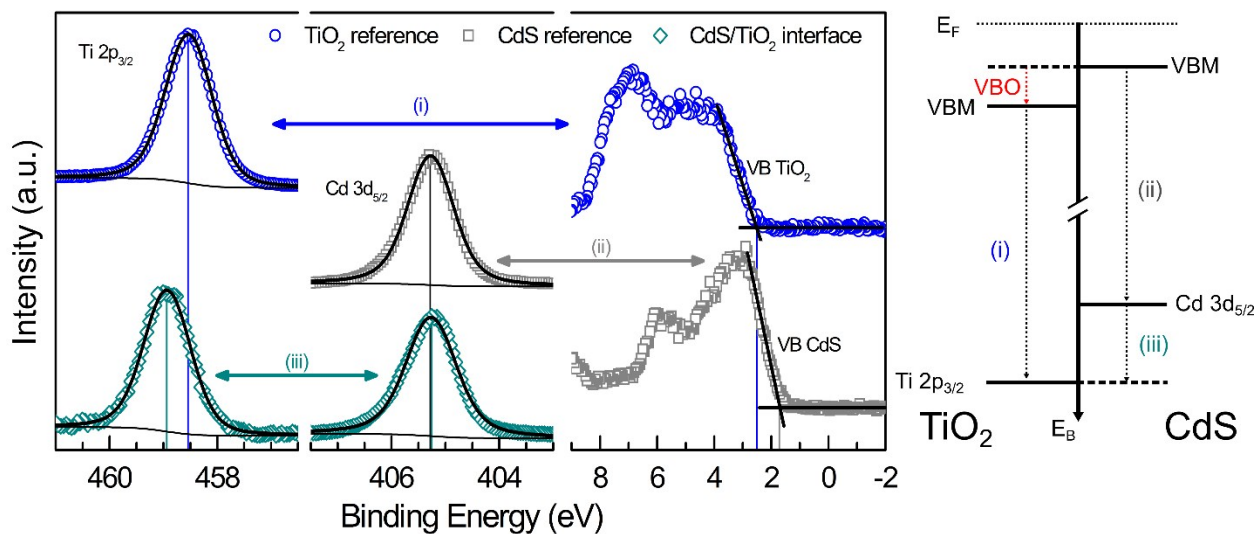

**Fig. S8:** Determination of valence band offset at CdS/TiO<sub>2</sub> interface using XPS. Valence band offset calculated based on binding energies of Ti2p<sub>3/2</sub> and Cd 3d<sub>5/2</sub> core levels and valence band maxima measured on TiO<sub>2</sub> reference, CdS reference, and CdS/TiO<sub>2</sub> interface.

**Table S1:** Binding energy values obtained by XPS from CdS reference, TiO<sub>2</sub> reference, and CdS/TiO<sub>2</sub> interface for calculation of valence and conduction band offsets.

|                                      | Binding Energy (eV)  |                      |      |
|--------------------------------------|----------------------|----------------------|------|
|                                      | Ti 2p <sub>3/2</sub> | Cd 3d <sub>5/2</sub> | VBM  |
| <b>CdS reference</b>                 | x                    | 405.26               | 1.70 |
| <b>TiO<sub>2</sub> reference</b>     | 458.53               | x                    | 2.52 |
| <b>CdS/TiO<sub>2</sub> interface</b> | 458.93               | 405.27               | x    |

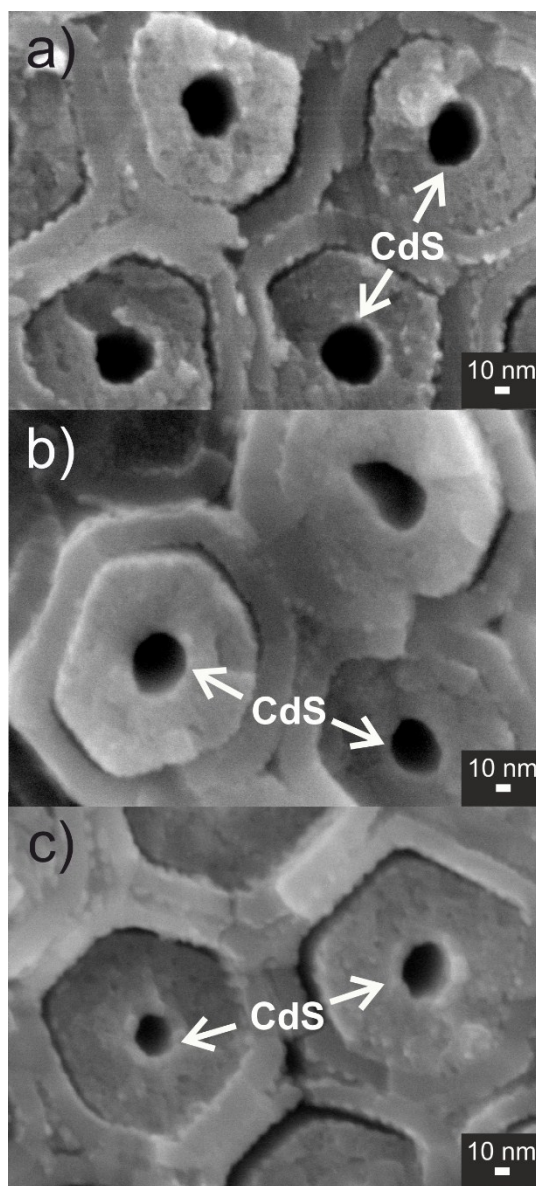

**Fig. S9.** SEM images of the bottom part of 20  $\mu\text{m}$  thick  $\text{TiO}_2$  nanotube layers with CdS coating of different thickness: a) 2.5 nm, b) 5 nm, and c) 10 nm.

## References

1 E. A. Kraut, R. W. Grant, J. R. Waldrop, and S. P. Kowalczyk, in *Precise Determination of the Valence-Band Edge in X-Ray Photoemission Spectra: Application to Measurement of Semiconductor Interface Potentials*, Phys. Rev. Lett., 1980, 44, pp. 1620–1623.
